# Supplementary material
Source: HighWire-hosted journal article supplement (https://www.cmajopen.ca/highwire/filestream/88297/field_highwire_adjunct_files/1/open-2022-0019-original-submission.pdf)
Supplement: open-2022-0019-original-submission.pdf [file open-2022-0019-original-submission.pdf]

# “This is not an American problem”: Lived Experiences of Asian Canadian Discrimination During the COVID-19 Pandemic

## AUTHORS

1. Jeanna Parsons Leigh\* (corresponding author)
2. Stephana Julia Moss\*
3. Faizah Tiifu
4. Emily FitzGerald
5. Rebecca Brundin-Mathers
6. Alexandra Dodds
7. Amanpreet Brar
8. Chloe Moira De Grood
9. Henry T. Stelfox
10. Kirsten M. Fiest\*\*
11. Josh Ng Kamstra\*\*

\*CO-FIRST AUTHORS

\*\*CO-SENIOR AUTHORS

## AFFILIATIONS

1. School of Health Administration, Faculty of Health, Dalhousie University
2. School of Health Administration, Faculty of Health, Dalhousie University
3. School of Health Administration, Faculty of Health, Dalhousie University
4. School of Health Administration, Faculty of Health, Dalhousie University
5. School of Health Administration, Faculty of Health, Dalhousie University
6. Department of Critical Care Medicine, Cumming School of Medicine, University of Calgary
7. Department of Surgery, University of Toronto, Toronto, Ontario
8. School of Health Administration, Faculty of Health, Dalhousie University
9. Department of Critical Care Medicine and O'Brien Institute for Public Health, Cumming School of Medicine, University of Calgary
10. Department of Critical Care Medicine, Cumming School of Medicine, University of Calgary
11. Department of Critical Care Medicine, Cumming School of Medicine, University of Calgary, and The Queen's Medical Center, Honolulu, HI, USA; Department of Surgery, University of Hawaii at Manoa John A Burns School of Medicine, Honolulu, HI, USA.

## FUNDING STATEMENT

Dr. Parsons Leigh has received a Grant from the Canadian Institutes of Health Research (Number 440241) to fund this study. All other authors report no conflict of interest or support from any organization for the submitted work.

## COMPETING INTERESTS

All authors report no conflict of interest related to the submitted work.

1  
2  
3  
4  
5  
6  
7  
8  
9  
10  
11  
12  
13  
14  
15  
16  
17  
18  
19  
20  
21  
22  
23  
24  
25  
26  
27  
28  
29  
30  
31  
32  
33  
34  
35  
36  
37  
38  
39  
40  
41  
42  
43  
44  
45  
46  
47  
48  
49  
50  
51  
52  
53  
54  
55  
56  
57  
58  
59  
60

**Abstract**

**Background**

Asian Canadians have experienced increased cases of racialized discrimination following the first emergence of SARS-Cov-2 in China. This study examined how COVID-19 has affected Asian Canadians’ sense of safety and belonging in their Canadian (i.e., geographical) communities.

**Methods**

Purposive and snowball sampling methods were used to recruit Asian Canadians diverse in region, gender, and age. We conducted semi-structured interviews (through Zoom videoconference or telephone) and used independent qualitative thematic analysis in duplicate to derive primary themes and subthemes.

**Results**

Thirty-two Asian Canadian participants described five predominant themes associated with how COVID-19 affected their sense of security and belonging to their communities during the pandemic: 1) Relationship between socio-economic status and exposure to discrimination; 2) Politics, media, and the COVID-19 pandemic; 3) Effect of discrimination on mental, physical, and social health; 4) Ways of coping with the impact of discrimination; and 5) Implications for sense of safety and sense of belonging.

**Conclusion**

During the COVID-19 pandemic, Asian Canadians in our study felt unsafe due to a rise in hate crimes and discrimination against people of Asian descent, while feeling a strong sense of belonging to their communities. Our findings emphasize the damaging role that fear plays in discrimination and stigmatization towards people of particular (usually minority) racial groups.

**Key words**

Asian Canadian; discrimination; attack/harassment; COVID-19; pandemic

## Introduction

The severe acute respiratory syndrome coronavirus 2 (SARS-CoV-2), beginning in Wuhan, China, spread rapidly across countries resulting in a global pandemic.<sup>1</sup> Although many impacts of the COVID-19 pandemic worldwide are clear,<sup>2</sup> including loss of life, decreased financial stability, and worsened physical and mental wellbeing,<sup>3-5</sup> the full extent of the damage is unknown.<sup>3,6</sup> The narrative that “others” from far-flung places are to blame for epidemics and pandemics, is a dramatic example of a long-standing tradition of hatred. Globally, in the COVID-19 pandemic, there has been an increase in negative attitudes, prejudice, and racism towards people of Asian descent, reinforcing longstanding systemic discrimination and negative stereotypes.<sup>6</sup>

Racial discrimination is defined as unequal treatment of persons or groups on the basis of their race or ethnicity.<sup>3</sup> During the COVID-19 pandemic, anti-Asian discrimination and Asian focused hate crimes have subjected Asians to verbal harassment including racial slurs and physical attacks.<sup>4,6</sup> Reported incidents have led to a heightened awareness of the broad marginalization of Asian populations, globally.<sup>7,8</sup> The experience of discrimination and its long-term consequences varies in context, such as where the harassment occurs (e.g., healthcare system, community), the actors involved (e.g., employers, neighbours<sup>9,10</sup>), and the people it targets.

There has been limited investigation into how Asian Canadians have experienced discrimination and the impacts this had. The objective of this study was to examine experiences and impacts of Asian Canadian discrimination during the COVID-19 pandemic on individual and Canadian (i.e., geographical) community sense of safety (the ability to engage with public spaces, in-person or online, without fear of discrimination, harassment, or violence) and belonging (concurrently identifying with a group or community that is important to them, and acceptance of that identity by other members of the group).<sup>3,6,7</sup>

## Methods

### *Study Design*

We applied a qualitative descriptive study design<sup>11</sup> to understand how COVID-19 has affected Asian Canadians' sense of safety and belonging. The University of Calgary Conjoint Health and Research Ethics Board (ID:REB20-0358) and Dalhousie University Health Science Research Ethics Board (ID:REB2020-5120) approved the study and permitted participants to provide oral consent in lieu of written consent. Interviews were conducted from March 23 to May 27, 2021. We followed the Consolidated Criteria for Reporting Qualitative Research [Appendix 1].

### *Participants*

Participants were eligible if they were English or French-speaking adults ( $\geq 18$  years) residing in Canada, self-identified as Asian/Asian Canadian and were able to provide informed consent. Eligible participants were recruited through a related survey-based study<sup>12</sup> where participants consented to be contacted for future COVID-19 research. We purposively sampled to ensure diversity across participants based on province, sex, and age. We interviewed everyone who agreed to participate. Preliminary analysis showed data saturation was achieved prior to analysis

of the full data set; we continued to analyze transcripts of all participants to guarantee diversity of data. Saturation was determined at the point when no new themes were identified.<sup>13</sup>

**Data Collection**

A semi-structured interview guide was developed iteratively, and pilot tested with seven Asian Canadian adults (external to the research team) to ensure clarity of interview questions and relevance to our study objective [Appendix 2]. Minor refinement after pilot testing was to improve language and conversational flow. Discussion topics included: community and personal identity, the racism participants or those in their community have experienced since the onset of the COVID-19 pandemic, the impacts of that racism, and finally how participants dealt with weathering racism. Participants’ demographic information was collected at the end of each interview. Two female research assistants (CDG, FT) trained in qualitative methods conducted interviews via Zoom (<https://zoom.us>) or telephone, based on participant preference. Interviews lasted a median of 21 minutes (IQR of 7.75) and were digitally recorded. Audio files were sent to a transcription company ([www.rev.com/](http://www.rev.com/)) to produce verbatim transcripts. The textual data was reviewed, cleaned, and de-identified by CDG and FT prior to analysis. Participants were offered the opportunity to review their transcripts as a form of member checking; three participants accepted.

**Data Management and Analysis**

We used NVIVO 12 (QSR International, Melbourne, Australia) to manage and analyze textual data. Two researchers (CDG, FT) independently reviewed and coded a small sample of transcripts (n=3), then in duplicate using open coding. Initial codes were compared and discussed with a senior qualitative researcher (JPL) to create a draft of the codebook. Two researchers (FT, AD) analyzed an additional three transcripts using both open and axial coding,<sup>14</sup> iteratively refining the codebook until all relevant ideas were included. Meetings were held after coding of every three transcripts for the duration of analysis to address new codes, consolidate ideas, and rectify disagreements by consensus. The complete dataset (n=32 transcripts) was then coded in duplicate with the finalized codebook. We used an intersectionality framework<sup>15</sup> and inductive thematic analysis<sup>16</sup> to closely examine the data and identify, analyze, and interpret repeating patterns of meanings.<sup>17</sup>

**Results**

We contacted the full sample (n=63) from the related study<sup>12</sup> by email. Two individuals (3%) were not interested in being interviewed on the topic; 42 (67%) did not respond to our email despite one follow-up attempt by email one week after the first invitation, and 19 (30%) consented to participate. From these 19 participants, we conducted snowball sampling, asking them to identify personal contacts who were eligible for the study and might be interested. Eleven people reached out to us of which we were able to interview nine; the remaining two did not respond to two contact attempts. In total, including four pilot interviews, 32 individuals participated (Table 1).

All participants in our study commented that they had experienced, indirectly through witnessing (n=14, 44%) or directly through verbal or physical harassment (n=18, 56%), discrimination during the COVID-19 pandemic in Canada. Thematic data analysis resulted in development of five themes: 1) Relationship between socio-economic status (SES) and exposure to discrimination; 2) Politics, media, and the COVID-19 pandemic; 4) Effect of discrimination on mental, physical, and social health; 4) Ways of coping with the impact of discrimination; and 5) Implications for sense of safety and sense of belonging.

## **I. Relationship between socio-economic status and exposure to discrimination**

The nature, and extent of discrimination experienced by Asian Canadians was expressed in relation to SES. Most participants noted that the discrimination experienced by Asians of higher SES were more likely to be direct. One participant commented on their relative immunity to Asian Canadian discrimination based on their housing situation:

“I’m pretty immune from all of this. I don’t live in one of those neighborhoods that has high density. I have my own house.” Male, Age 38, British Columbia

In contrast, most participants suggested that Asian Canadians of lower SES were more likely to experience direct discrimination (e.g., verbal and/or physical attacks or harassment) due to their need to maintain interactions in the community during COVID-19 (e.g., through work in public-facing occupations). One participant of lower SES commented on their direct experiences with discrimination:

“Would a higher income and graduate degree protect me against racism and discrimination? Maybe. Even though I experienced higher [socio-economic] status here [in Canada] after immigrating I feel more socially isolated and depressed and never have I ever experienced this more than right now in the pandemic.” Male, Age 65, Saskatchewan

## **II. Politics, media, and the COVID-19 pandemic**

All participants expressed the key role that politicians and media played in enabling spread of Asian Canadian discrimination and fear toward Asians. They described influential and prominent leaders choosing to deliberately spread misinformation and disinformation by blaming, and inciting hatred towards Asians. Participants described upsetting rhetoric such as “China virus,” and “Kung flu,” used by politicians and their supporters alike. Amplified by the media, inflamed hate was weaponized to hurt people of Asian descent. Participants commented that politicians, especially in the United States, deliberately misled, triggered, and emboldened their supporters to attack/harass Asians. One participant described:

“Trump saying that it's the China virus it's obviously we cover so much U.S. politics in Canada that I think it's influenced the crazy people in our country as well. Or it's resonated with them, I guess.” Female, Age 24, British Columbia

All participants commented on mainstream media being a platform to spread blame or responsibility for the virus. Some participants experienced cyberbullying, which they found was

based mostly on physical appearance and/or accent. One participant reflected on the rapid dissemination of misinformation across media platforms:

“This seems to be a pretty common thread among people who believe conspiracy theories, or are unable to differentiate what is a news source from a reputable journalist or reporter or news agency versus... Or being able to recognize what is just inflammatory commentary or just something they made up or skewed to achieve the outcomes of say, I don't know, a racist organization or low-level white supremacist organizations just looking to recruit more members.” Female, Age 35, Ontario

**III. Effects of discrimination on mental, physical, and social health**

Most participants described the effects of racism as immeasurable and the impact on their mental, physical, and social health as devastating. The participants illustrated common perspectives while describing variability in their experiences, perceptions, and evaluations of discrimination. One participant described their efforts to cope with the psychological impact of discrimination through resiliency:

“This is not an American problem. Now, more than ever, we need to come together to raise awareness of the challenges faced by our communities, to confront the people who are psychologically abusing us—it’s not okay.” Male, Age 66, Ontario

The lived experiences and psychological and emotional impacts of discrimination among participants during COVID-19 included depression, anxiety, and persistent stress, as recounted by one participant:

“I eat more when depressed leading to weight gain and lack of vitamin D due to staying indoors for too long, and then stress and anxiety that's just always present compared to before the pandemic. It's just that the mental impacts of it [racism] can be sometimes really overwhelming.” Male, 46, Quebec

Participants discussed their worry of not knowing who, where, and why a discriminatory attack may occur. The burden of worry led to an additional layer of trauma and exhaustion from precautions for personal safety. One participant described feelings of disconcerted discomfort:

“There is a certain kind of unsettling discomfort just knowing that people do blame such a large scale, horrific pandemic on one community, and on people that look like me, or that look like my parents.” Female, Age 24, Ontario

**IV. Ways of coping with the impacts of discrimination**

Participants dealt with discrimination in different ways. Some coping mechanisms included: relying on friends and family for support, ignoring social media and doing activities in groups. One participant explained how they coped with the stress:



“Well, you just got to live your normal life. You still have to do your things. You got to do the best you can, just make sure you practice all your safety measures, and like I said, it’s no guarantee, but some things you can’t avoid, you just got to do your best.” Male, Age 54, British Columbia

All participants highlighted the countless contextual factors (related to one’s personal life) that are associated with personal experiences of Asian Canadian discrimination, prior to and within the COVID-19 pandemic. While one person’s life experience is not the same as another’s, it may be that some personal experiences are so profound that they transcend individuality to the collective. One participant reflected on their feelings of hopelessness:

“You know that anti-Asian racism is on the rise in Canada, and I know that now because of the pandemic this issue has come to light, but it’s been going on for so long that I’ve lost my resiliency.” Female, Age 27, Ontario

## **V. Implications for sense of physical and psychological safety and sense of belonging**

Although participants’ sense of physical and psychological safety was greatly affected (i.e., diminished sense of safety), their sense of belonging was minimally affected. All participants expressed feeling a multitude of emotions simultaneously (e.g., anxious, scared, depressed, angry, outrage) that sometimes were in conflict in dealing with the trauma associated with Asian Canadian discrimination during the pandemic. Consequently, participants felt unable to safely use public spaces in-person for fear of discrimination. Most participants commented on the uncertainty (e.g., inability to predict who the perpetrator might be), unexpectedness (e.g., sudden attack, harassment, or assault), and unpredictability (e.g., random behaviors of others/element of surprise) of discrimination that made it difficult to feel and keep safe. All participants described the need to remain alert in anticipation of harm, leading to distress and exhaustion. One participant recounted:

“All of the Asian hate crimes are scary, in my opinion. I am less willing to do things alone and go out into neighborhoods by myself.” Female, Age 25, British Columbia

In contrast, some participants noted acts of discrimination as having limited impact on their sense of belonging. These participants felt connected to and strongly identified with their Canadian and Asian cultures and communities. For example, in addition to their Asian heritage, participants noted “being Canadian” was an integral part of their identity. Some participants believed that the discrimination hadn’t affected how they were perceived by the broader Canadian society. Strictly adhering to public prevention practices/guidelines, as part of the greater good, made participants feel they were a part of, and belonged to, the community.

“Working together and following the guidelines, I think that it’s because we’re proud to be Canadian. We try to support that just as much as we support our other cultural beliefs as well—it’s a balance.” Female, Age 27, Ontario

## **Discussion**

1  
2  
3  
4  
5  
6  
7  
8  
9  
10  
11  
12  
13  
14  
15  
16  
17  
18  
19  
20  
21  
22  
23  
24  
25  
26  
27  
28  
29  
30  
31  
32  
33  
34  
35  
36  
37  
38  
39  
40  
41  
42  
43  
44  
45  
46  
47  
48  
49  
50  
51  
52  
53  
54  
55  
56  
57  
58  
59  
60

We conducted a qualitative descriptive study to examine Asian Canadian discrimination during the COVID-19 pandemic, and the impact this had on individual and community sense of safety and belonging. Findings from our study suggest that Asian Canadians felt unsafe due to the uncertain, unexpected, and/or unpredictable nature of rising discrimination. The overwhelming feeling of unsafety among Asian Canadians was associated with self-reported anxiety, depression, stress, fear, and panic. Our findings also suggest that despite feeling scared during the pandemic, Asian Canadians’ felt a strong sense of belonging to Canadian society and felt well connected to their Asian Canadian communities.

Our study suggests that during the COVID-19 pandemic, Asian Canadians experienced psychological and physical distress in response to discrimination. These experiences reflect established vulnerabilities encountered by racialized minorities before the pandemic.<sup>18</sup> Previous research found racially stigmatized peoples experience a high rate of physical, psychological and social illnesses and impairments.<sup>19</sup> Moreover, the threat of discrimination contributed to participants mental exhaustion, and feelings of unsafety. These findings are mirrored in similar research that found participants describing an intense fear for their lives and their loved ones during the pandemic in reaction to discrimination.<sup>18</sup> Racism focuses on attacking an entire community<sup>20</sup> due to the biased belief that all members of a racial group share an important essence that makes them the same.<sup>21</sup> This may explain why participants in our study who did not directly experience discrimination felt impacted by discrimination towards other Asian Canadians.

Understanding the socioeconomic spectrum and the relationship between race and SES is important to addressing disparities among racial groups during periods of health crises.<sup>22</sup> SES is an important determinant of health outcomes.<sup>19</sup> Asian Canadians of lower SES are more prone to and encounter higher levels of physical attacks/harassment because they work and engage in activities that require the use of public spaces, which makes it easier to target, identify, access, and attack them.<sup>23,24</sup> Our findings highlight that media consumption could differ between high and low SES Asians, which could explain the differential experience in indirect discrimination.<sup>25</sup> However, exposure to, and consumption of media that portrays socially stigmatized groups as a threat to society has increased racial prejudice, and negatively influenced public attitudes<sup>26,27</sup>; information disseminated by politicians and mainstream media also has been found to influence public behaviors.<sup>25</sup> Croucher and colleagues found that social media users who perceived information on social media to be accurate and fair were more likely to believe that Chinese Americans could pose realistic threats (e.g., threats to physical and material well-being) and symbolic threats (e.g., threats to morals, values, and beliefs).<sup>6</sup> Additionally, He and colleagues revealed that the presence of anti-Asian hate speech on Twitter was more prevalent than counter-hate messages during the COVID-19 pandemic.<sup>28</sup> The information dissemination process affects emotions and behaviors that directly impacts how public opinions are formed.<sup>29</sup> Future work should seek to understand the influence of social media effects on treatment and attitudes toward Asian Canadians.<sup>30</sup>

This study needs to be considered in context of limitations. First, the transferability of lived experiences of Asian Canadians was potentially limited as our sample was comprised of



primarily highly educated, single Asian Canadians. These demographics suggest that our sample was mainly high SES. As well, perspectives from children and youth were missed. Second, we did not include participants from South Asian Canadian communities, which is important considering the volume of racist rhetoric these communities faced at the height of the pandemic. Third, our study was unable to ascertain the extent and directional impact of social media on Asian Canadians. For example, whether the positive impact outweighed the negative impact, or the visa versa, particularly with participant's sense of belonging. Fourth, we conducted interviews in English and French only and perspectives from non-English speaking Asian Canadians were missed, which excludes experiences of new immigrants.

## Conclusion

Asian Canadian participants in our study felt unsafe due to increased experiences of direct and/or indirect stigmatization, discrimination, and disruption of various aspects of their lives since the start of the COVID-19 pandemic. Our findings emphasize the damaging role that fear plays in fueling discrimination and stigmatization by the majority group towards people of particular (usually minority) racial groups. It is imperative that Canadians are aware of the risk of scapegoating during times of crisis including the role of media and need for strategies including societal leadership to counteract.

References

1. Rzymiski P, Nowicki M. COVID-19-related prejudice toward Asian medical students: A consequence of SARS-CoV-2 fears in Poland. *J Infect Public Health*. 2020;13:873-6.

2. Dhanani LY, Franz B. Unexpected public health consequences of the COVID-19 pandemic: a national survey examining anti-Asian attitudes in the USA. *International Journal of Public Health*. 2020;65:747-54.

3. Choi S, Hong JY, Kim YJ, Park H. Predicting Psychological Distress Amid the COVID-19 Pandemic by Machine Learning: Discrimination and Coping Mechanisms of Korean Immigrants in the U.S. *Int J Environ Res Public Health*. 2020;17.

4. Gover AR, Harper SB, Langton L. Anti-Asian Hate Crime During the COVID-19 Pandemic: Exploring the Reproduction of Inequality. *American Journal of Criminal Justice*. 2020;45:647-67.

5. Liu Y, Finch BK, Brenneke SG, Thomas K, Le PD. Perceived Discrimination and Mental Distress Amid the COVID-19 Pandemic: Evidence From the Understanding America Study. *American Journal of Preventive Medicine*. 2020;59:481-92.

6. Croucher SM, Nguyen T, Rahmani D. Prejudice Toward Asian Americans in the Covid-19 Pandemic: The Effects of Social Media Use in the United States. *Frontiers in Communication*. 2020;5.

7. Chen JA, Zhang E, Liu CH. Potential Impact of COVID-19-Related Racial Discrimination on the Health of Asian Americans. *Am J Public Health*. 2020;110:1624-7.

8. Dionne KY, Turkmen FF. The Politics of Pandemic Othering: Putting COVID-19 in Global and Historical Context. *International Organization*. 2020;74:E213-E30.

9. Darling-Hammond S, Michaels EK, Allen AM, et al. After "The China Virus" Went Viral: Racially Charged Coronavirus Coverage and Trends in Bias Against Asian Americans. *Health Educ Behav*. 2020;47:870-9.

10. Jenkins M, Houge Mackenzie S, Hodge K, Hargreaves EA, Calverley JR, Lee C. Physical Activity and Psychological Well-Being During the COVID-19 Lockdown: Relationships With Motivational Quality and Nature Contexts. *Frontiers in Sports and Active Living*. 2021;3.

11. Colorafi KJ, Evans B. Qualitative Descriptive Methods in Health Science Research. *Herd*. 2016;9:16-25.

12. Parsons Leigh J, Fiest K, Brundin-Mather R, et al. A national cross-sectional survey of public perceptions of the COVID-19 pandemic: Self-reported beliefs, knowledge, and behaviors. *PLOS ONE*. 2020;15:e0241259.

13. Saunders B, Sim J, Kingstone T, et al. Saturation in qualitative research: exploring its conceptualization and operationalization. *Qual Quant*. 2018;52:1893-907.

14. Kendall J. Axial coding and the grounded theory controversy. *West J Nurs Res*. 1999;21:743-57.

15. Atewologun D. Intersectionality Theory and Practice: Oxford University Press; 2018.

16. Thomas DR. A General Inductive Approach for Analyzing Qualitative Evaluation Data. *American Journal of Evaluation*. 2006;27:237-46.

17. Kiger ME, Varpio L. Thematic analysis of qualitative data: AMEE Guide No. 131. *Medical Teacher*. 2020;42:846-54.

18. Hahm HC, Xavier Hall CD, Garcia KT, et al. Experiences of COVID-19-related anti-Asian discrimination and affective reactions in a multiple race sample of U.S. young adults. *BMC Public Health*. 2021;21:1563.

19. Williams DR, Mohammed SA, Leavell J, Collins C. Race, socioeconomic status, and health: complexities, ongoing challenges, and research opportunities. *Ann N Y Acad Sci*. 2010;1186:69-101.

20. Karlsen S, Nazroo JY. Relation between racial discrimination, social class, and health among ethnic minority groups. *American journal of public health*. 2002;92:624-31.

21. No S, Hong YY, Liao HY, Lee K, Wood D, Chao MM. Lay theory of race affects and moderates Asian Americans' responses toward American culture. *J Pers Soc Psychol*. 2008;95:991-1004.

22. Williams DR, Priest N, Anderson NB. Understanding associations among race, socioeconomic status, and health: Patterns and prospects. *Health Psychol.* 2016;35:407-11.
23. Cheon YM, Ip PS, Yip T. Adolescent profiles of ethnicity/race and socioeconomic status: Implications for sleep and the role of discrimination and ethnic/racial identity. *Adv Child Dev Behav.* 2019;57:195-233.
24. Gee GC, Ro A, Shariff-Marco S, Chae D. Racial Discrimination and Health Among Asian Americans: Evidence, Assessment, and Directions for Future Research. *Epidemiologic Reviews.* 2009;31:130-51.
25. Yang C-c, Tsai J-Y, Pan S. Discrimination and Well-Being Among Asians/Asian Americans During COVID-19: The Role of Social Media. *Cyberpsychology, Behavior, and Social Networking.* 2020;23:865-70.
26. Arendt F. Dose-Dependent Media Priming Effects of Stereotypic Newspaper Articles on Implicit and Explicit Stereotypes. *Journal of Communication.* 2013;63:830-51.
27. Dasgupta N. Chapter Five - Implicit Attitudes and Beliefs Adapt to Situations: A Decade of Research on the Malleability of Implicit Prejudice, Stereotypes, and the Self-Concept. In: Devine P, Plant A, eds. *Advances in Experimental Social Psychology.* Vol 47: Academic Press; 2013:233-79.
28. He B, Ziems, C., Soni, S., Ramakrishnan, N., Yang, D., Kumar, S. Racism is a Virus: Anti-Asian Hate and Counterspeech in Social Media during the COVID-19 Crisis. *COVID-19 e-print.* 2020.
29. Hu H, Mao H, Hu X, et al. Information Dissemination of Public Health Emergency on Social Networks and Intelligent Computation. *Computational Intelligence and Neuroscience.* 2015;2015:181038.
30. Valkenburg PM, Peter J, Walther JB. Media Effects: Theory and Research. *Annual Review of Psychology.* 2016;67:315-38.

Table 1. Demographics of participants

| Characteristic               | Participant (n=32) |
|------------------------------|--------------------|
| Age, median (IQR)            | 35 (24, 46)        |
| Female, n (%)                | 18 (56%)           |
| Education*, n (%)            |                    |
| Less than high school        | 0 (0%)             |
| High school                  | 0 (0%)             |
| College degree               | 3 (11%)            |
| Bachelor's degree            | 16 (43%)           |
| Postgraduate degree          | 1 (4%)             |
| Master's degree              | 8 (29%)            |
| Household size, median (IQR) | 3 (1, 5)           |
| Marital Status*, n (%)       |                    |
| Single                       | 18 (56.3)          |
| Married                      | 10 (32.3)          |
| Divorced                     | 1 (3.1)            |
| Has Children*, n (%)         | 9 (30%)            |
| Children live with you       | 7 (78%)            |
| Province, n (%)              |                    |
| Alberta                      | 5 (16%)            |
| British Columbia             | 6 (19%)            |
| Ontario                      | 18 (56%)           |
| Quebec                       | 2 (6%)             |
| Saskatchewan                 | 1 (3%)             |
| Ethnicity**, n (%)           |                    |
| East Asian                   | 14 (44%)           |
| Southeast Asian              | 5 (16%)            |
| South Asian                  | 10 (31%)           |
| West Asian                   | 3 (9%)             |

\*N will be less than number of participants as some participants chose not to disclose demographic information

\*\*Ethnicity was categorized using the UN Statistics Division of regions (available at: <https://unstats.un.org/unsd/methodology/m49/>). Multiple ethnicities (i.e. “multiracial” or “mixed-race”) were included under the region of the Asian component of their reported ethnicity.

**Table 2.** Exemplar quotations by theme

| Theme                                                                   | Exemplar Quotations                                                                                                                                                                                                                                                                                                                                                                                                                                                                                                                                                                                                                                                                                                                                                                                          |
|-------------------------------------------------------------------------|--------------------------------------------------------------------------------------------------------------------------------------------------------------------------------------------------------------------------------------------------------------------------------------------------------------------------------------------------------------------------------------------------------------------------------------------------------------------------------------------------------------------------------------------------------------------------------------------------------------------------------------------------------------------------------------------------------------------------------------------------------------------------------------------------------------|
| <i>Relationship between SES and exposure to discrimination</i>          | <p>“I’m pretty immune from all of this. I don’t live in one of those neighborhoods that has high density. I have my own house.” Male, Age 38, British Columbia</p> <p>“Would a higher income and graduate degree protect me against racism and discrimination? Maybe. Even though I experienced higher [socio-economic] status here [in Canada] after immigrating I feel more socially isolated and depressed and never have I ever experienced this more than right now in the pandemic.” Male, Age 65, Saskatchewan</p>                                                                                                                                                                                                                                                                                    |
| <i>Politics, media, and the COVID-19 pandemic</i>                       | <p>“Trump saying that it's the China virus it's obviously we cover so much U.S. politics in Canada that I think it's influenced the crazy people in our country as well. Or it's resonated with them, I guess.” Female, Age 24, Ontario</p> <p>“That seems to be a pretty common thread among people who believe conspiracy theories, or are unable to differentiate what is a news source from a reputable journalist or reporter or news agency versus... Or being able to recognize what is just inflammatory commentary or just something they made up or skewed to achieve the outcomes of say, I don't know, a racist organization or low-level white supremacist organizations just looking to recruit more members.” Female, Age 35, Ontario</p>                                                     |
| <i>Effects of discrimination on mental, physical, and social health</i> | <p>“This is not an American problem. Now, more than ever, we need to come together to raise awareness of the challenges faced by our communities, to confront the people who are psychologically abusing us—it’s not okay.” Male, Age 66, Ontario</p> <p>“I eat more when depressed leading to weight gain and lack of vitamin D due to staying indoors for too long, and then stress and anxiety that's just always present compared to before the pandemic. It's just that the mental impacts of it can be sometimes really overwhelming.” Male, 46, Quebec</p> <p>“There is a certain kind of unsettling discomfort just knowing that people do blame such a large scale, horrific pandemic on one community, and on people that look like me, or that look like my parents.” Female, Age 24, Ontario</p> |
| <i>Ways of coping with the impacts of discrimination</i>                | <p>“Well, you just got to live your normal life. You still have to do your things. You got to do best you can, just make sure you practice, all your safety measures, and like I said, it’s no guarantee, but some things you can’t avoid, you just got to do your best.” Male, Age 54, British Columbia</p> <p>“You know that anti-Asian racism is on the rise in Canada, and I know that now because of the pandemic this issue has come to light, but it’s been going on for so long that I’ve lost my resiliency.” Female, Age 27, Ontario</p>                                                                                                                                                                                                                                                           |
| <i>Implications for sense of safety and belonging</i>                   | <p>“All of the Asian hate crimes are scary, in my opinion. I am less willing to do things alone and go out into neighborhoods by myself.” Female, Age 25, British Columbia</p> <p>“Working together and following the guidelines, I think that it’s because we're proud to be Canadian. We try to support that just as much as we support our other cultural beliefs as well—it’s a balance.” Female, Age 37, Ontario</p>                                                                                                                                                                                                                                                                                                                                                                                    |

Appendix 1. Consolidated Criteria for Reporting Qualitative Research Checklist

| No. Item                                       | Guide Questions or Description                                                                          | Reported on Page #                 |
|------------------------------------------------|---------------------------------------------------------------------------------------------------------|------------------------------------|
| <b>DOMAIN 1: RESEARCH TEAM AND REFLEXIVITY</b> |                                                                                                         |                                    |
| <i>Personal Characteristics</i>                |                                                                                                         |                                    |
| 1. Interviewer/facilitator                     | Which author/s conducted the interview or focus group?                                                  | Results                            |
| 2. Credentials                                 | What were the researcher's credentials?                                                                 | Methods                            |
| 3. Occupation                                  | What was their occupation at the time of the study?                                                     | Methods                            |
| 4. Gender                                      | Was the researcher male or female?                                                                      | N/A                                |
| 5. Experience and training                     | What experience or training did the researcher have?                                                    | Methods                            |
| <i>Relationship with participants</i>          |                                                                                                         |                                    |
| 6. Relationship established                    | Was a relationship established prior to study commencement?                                             | N/A                                |
| 7. Participant knowledge of the interviewer    | What did the participants know about the researcher?                                                    | N/A                                |
| 8. Interviewer characteristics                 | What characteristics were reported about the interviewer/facilitator?                                   | Methods                            |
| <b>DOMAIN 2: STUDY DESIGN</b>                  |                                                                                                         |                                    |
| <i>Theoretical framework</i>                   |                                                                                                         |                                    |
| 9. Methodological orientation and Theory       | What methodological orientation was stated to underpin the study?                                       | Methods                            |
| <i>Participant selection</i>                   |                                                                                                         |                                    |
| 10. Sampling                                   | How were participants selected?                                                                         | Methods                            |
| 11. Method of approach                         | How were participants approached?                                                                       | Methods                            |
| 12. Sample size                                | How many participants were in the study?                                                                | Results                            |
| 13. Nonparticipation                           | How many people refused to participate or dropped out? Reasons?                                         | Methods                            |
| <i>Setting</i>                                 |                                                                                                         |                                    |
| 14. Setting of data collection                 | Where was the data collected?                                                                           | Methods                            |
| 15. Presence of non-participants               | Was anyone else present besides the participants and researchers?                                       | Results                            |
| 16. Description of sample                      | What are the important characteristics of the sample?                                                   | Results                            |
| <i>Data collection</i>                         |                                                                                                         |                                    |
| 17. Interview guide                            | Were questions, prompts, guides provided by the authors? Was it pilot tested?                           | Methods                            |
| 18. Repeat interviews                          | Were repeat inter views carried out? If yes, how many?                                                  | N/A                                |
| 19. Audio/visual recording                     | Did the research use audio or visual recording to collect the data?                                     | Methods                            |
| 20. Field notes                                | Were field notes made during and/or after the interview or focus group?                                 | Methods                            |
| 21. Duration                                   | What was the duration of the inter views or focus group?                                                | Methods                            |
| 22. Data saturation                            | Was data saturation discussed?                                                                          | Methods                            |
| 23. Transcripts returned                       | Were transcripts returned to participants for comment and/or correction?                                | N/A                                |
| <b>DOMAIN 3: ANALYSIS AND FINDINGS</b>         |                                                                                                         |                                    |
| <i>Data analysis</i>                           |                                                                                                         |                                    |
| 24. Number of data coders                      | How many data coders coded the data?                                                                    | Methods                            |
| 25. Description of the coding tree             | Did authors provide a description of the coding tree?                                                   | N/A                                |
| 26. Derivation of themes                       | Were themes identified in advance or derived from the data?                                             | Methods                            |
| 27. Software                                   | What software, if applicable, was used to manage the data?                                              | NVivo                              |
| 28. Participant checking                       | Did participants provide feedback on the findings?                                                      | Strengths and limitations          |
| <i>Reporting</i>                               |                                                                                                         |                                    |
| 29. Quotations presented                       | Were participant quotations presented to illustrate the themes/findings? Was each quotation identified? | Results                            |
| 30. Data and findings consistent               | Was there consistency between the data presented and the findings?                                      | Relationship to existing knowledge |
| 31. Clarity of major themes                    | Were major themes clearly presented in the findings?                                                    | Results                            |
| 32. Clarity of minor themes                    | Is there a description of diverse cases or discussion of minor themes?                                  | Discussion                         |



## Appendix 2. Semi-structured interview guide

1. Can you please tell me about yourself?
  - a. How would you describe your family's cultural or ethnic community?
    - i. How connected or distant do you feel to that community?
  - b. How would you describe your personal or ethnic cultural identity?
2. Thinking back to the start of the pandemic until now, have you personally experienced any type of discrimination or racism?
  - a. Has your broader community been exposed to racism?
    - i. Do you see any patterns in people you know who have experienced these instances (similarities/differences/quantity)?
  - b. IF NOT, Why do you think you have not experienced any form of discrimination or racism?
3. Do you feel as if you have encountered an increase in race-based insults, harassment or violence in-person or through social media since the onset of COVID-19?
  - a. Have you experienced any of these encounters in your workplace?
  - b. Can you describe some of the ways that this experience/experiences have impacted you?
  - c. Have these experiences, or knowledge of other's experiences affected your sense of safety in your community?
  - d. Have they affected or influenced how you engage with infection prevention practices? (e.g., mask-wearing, physical distancing)
4. Has the pandemic impacted you or your community economically?
  - a. Is this different from the general population?
5. Since the onset of the COVID-19 pandemic, do you feel as though there has been a change in how your community is perceived by the public?
  - i. If No, Can you describe how you feel your community is broadly perceived by the public?
  - b. Do you think this has been influenced by the media coverage on COVID-19?
  - c. Has this affected how you feel about your 'Canadian' identity or how others see you as 'Canadian'?
6. How have you found resilience through these experiences?
  - a. Can you describe any strategies that have empowered you in these experiences?

Do you have any final thoughts?

Thank you for participating in our study.
